# Supplementary material for: Using dual exonucleases to finely distinguish structural adjustment of aptamers for small-molecule detection
Source: Royal Society of Chemistry journal article supplement (doi:10.1039/d1ra05551h), 2021-01-01
Supplement: d1ra05551h1.pdf [file d1ra05551h1.pdf]

## Supplementary Information

### Going dual exonucleases to finely distinguish structural adjustment of aptamers for small-molecule detection

Lancheng Wang,<sup>a</sup> Huimin Zhou,<sup>a</sup> Kun Yan,<sup>b</sup> Peng Xu,<sup>c</sup> Bin Di,<sup>b</sup> Chi Hu,<sup>a\*</sup> and Mengxiang Su<sup>b\*</sup>

<sup>a</sup> Department of Pharmaceutical Engineering, School of Engineering, China Pharmaceutical University, Nanjing 211198, PR China

<sup>b</sup> Department of Pharmaceutical Analysis, School of Pharmacy, China Pharmaceutical University, Nanjing 211198, P.R.

China

<sup>c</sup> Key Laboratory of Drug Monitoring and Control, Drug Intelligence and Forensic Center, Ministry of Public Security, No.18 Dongbeiwang West Road, Beijing 100193, P.R. China

E-mail: [chihu@cpu.edu.cn](mailto:chihu@cpu.edu.cn); [sumengxiang@cpu.edu.cn](mailto:sumengxiang@cpu.edu.cn)

## Supplementary Figures

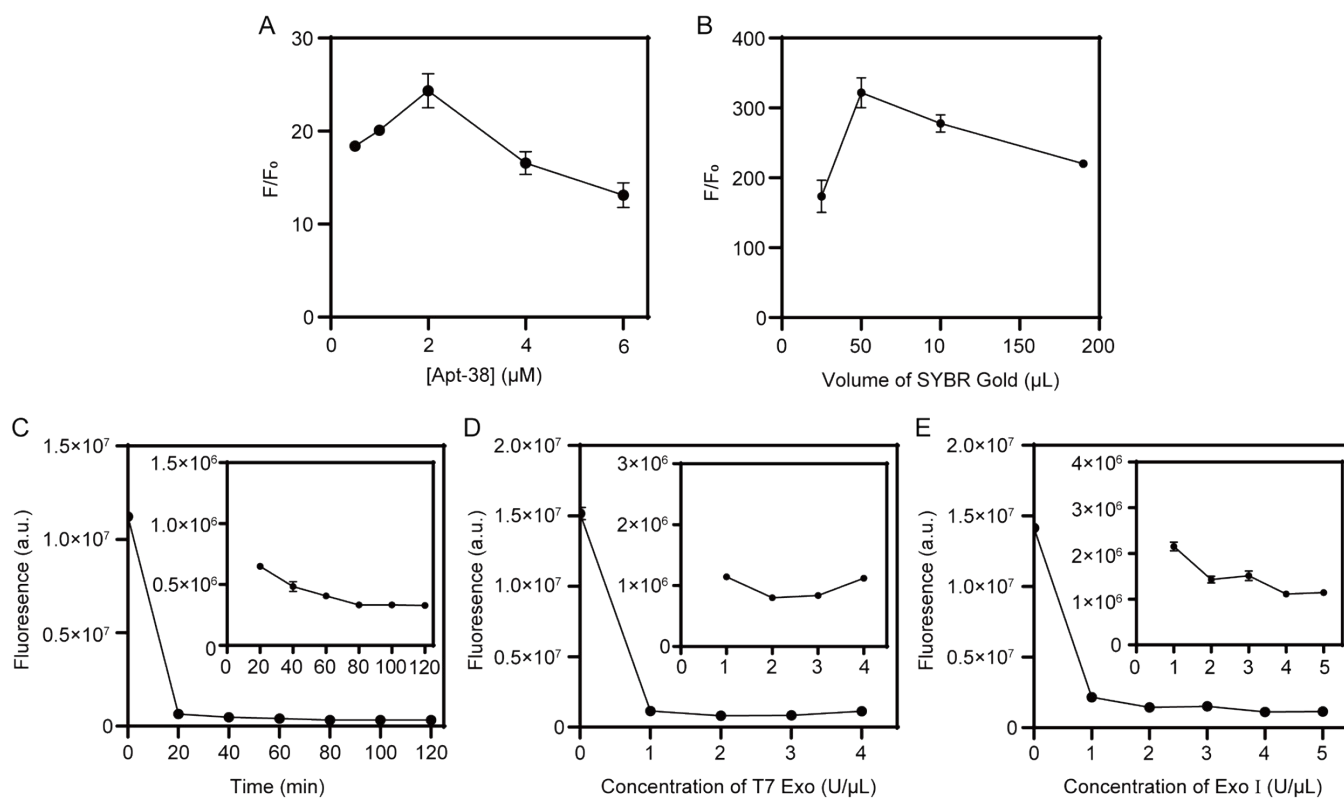

**Fig. S1** (A) Optimizing of the concentration of aptamer; (B) Optimizing of the volumes of SYBR Gold (2 $\times$ ); (C) Optimizing of the enzymatic reaction time; (D) Optimizing of the concentration of T7 Exo and (E) Exo I for quinine detection. Error bars represent the standard deviations of three measurements.

In Fig. S1A, the aptamer concentration from 0.5 to 6  $\mu\text{M}$  had been chosen to optimize the quinine detection, the concentrations in the reaction solution of the T7 Exo and Exo I was 2  $\text{U}/\mu\text{L}$  and 4  $\text{U}/\mu\text{L}$ . The time of enzymatic reaction was 90 min, and 50  $\mu\text{L}$  2 $\times$  SYBR Gold was added to the reaction solution for further measurement.  $F$  and  $F_0$  represent the fluorescence intensities in the before and after digestion, respectively.

In Fig. S1B, the SYBR Gold (2 $\times$ ) volume from 25 to 190  $\mu\text{L}$  had been chosen to optimize the quinine detection, the concentrations in the reaction solution of the aptamer, T7 Exo and Exo I was 2  $\mu\text{M}$ , 2  $\text{U}/\mu\text{L}$ , and 4  $\text{U}/\mu\text{L}$ . The time of enzymatic reaction was 90 min, and different volumes of 2 $\times$  SYBR Gold

was added to the reaction solution for further measurement.  $F$  and  $F_0$  represent the fluorescence intensities in the presence and absence of aptamer, respectively.

In Fig. S1C, the enzymatic reaction time from 0 to 120 min had been chosen to optimize the quinine detection, the concentrations in the reaction solution of the aptamer, T7 Exo and Exo I was 2  $\mu\text{M}$ , 2  $\text{U}/\mu\text{L}$ , and 4  $\text{U}/\mu\text{L}$ . 10  $\mu\text{L}$  of the reaction solution was sampled at 20min intervals, respectively, and 50  $\mu\text{L}$  2 $\times$  SYBR Gold was added to the reaction solution for further measurement. The inset is the local enlarged image of 20-120 min.

In Fig. S1D, the T7 Exo concentration from 0 to 4  $\text{U}/\mu\text{L}$  had been chosen to optimize the quinine detection, the concentrations in the reaction solution of the aptamer and Exo I was 2  $\mu\text{M}$  and 4  $\text{U}/\mu\text{L}$ . The time of enzymatic reaction was 90 min, and 50  $\mu\text{L}$  2 $\times$  SYBR Gold was added to the reaction solution for further measurement. The inset chart shows the enlarged curve in the T7 Exo concentration range of 1-4  $\text{U}/\mu\text{L}$ .

In Fig. S1E, the Exo I concentration from 0 to 5  $\text{U}/\mu\text{L}$  had been chosen to optimize the quinine detection, the concentrations in the reaction solution of the aptamer and T7 Exo was 2  $\mu\text{M}$  and 2  $\text{U}/\mu\text{L}$ . The time of enzymatic reaction was 90 min, and 50  $\mu\text{L}$  2 $\times$  SYBR Gold was added to the reaction solution for further measurement. The inset chart shows the enlarged curve in the Exo I concentration range of 1-5  $\text{U}/\mu\text{L}$ .

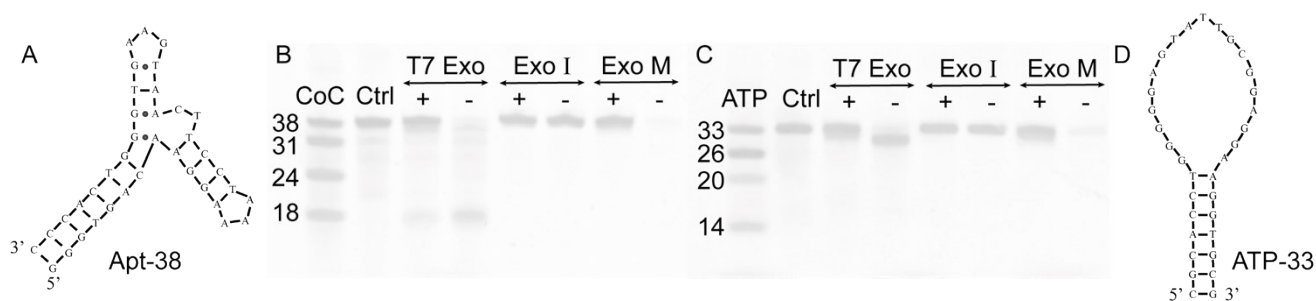

**Fig. S2** Oligonucleotide structure and PAGE analysis of exonuclease digestion products of Apt-38 (A, B) and ATP-33 (C, D) with (+) and without (-) 2 mM cocaine or ATP, as generated by T7 Exo, Exo I, or a mixture of both.

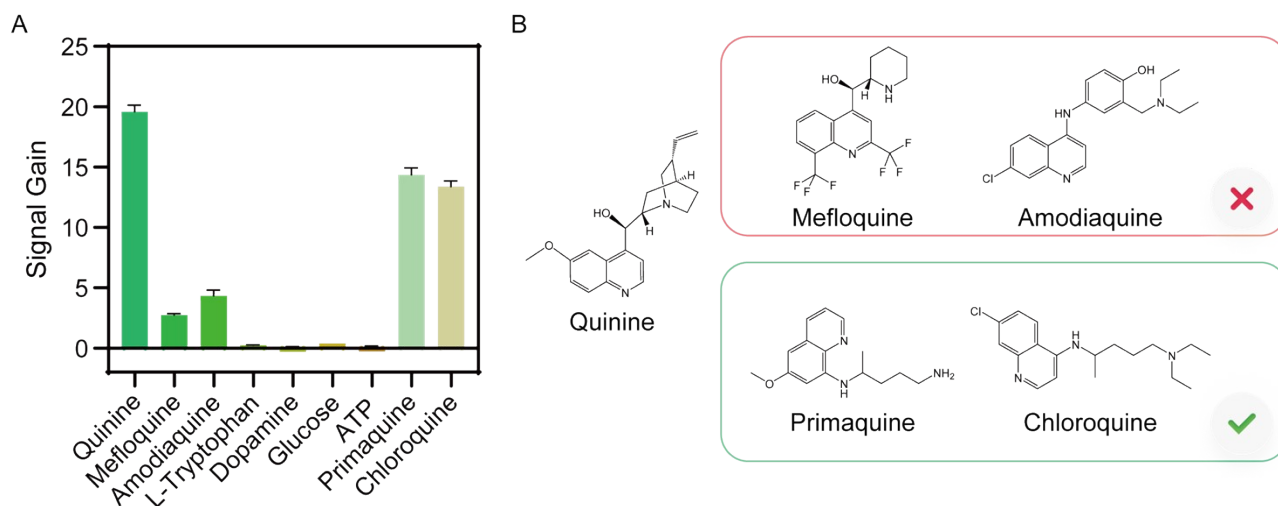

**Fig. S3** (A) The dual-exonuclease-inhibition method cross-reactivity and selectivity to similarly structured antimalarial compounds and other disruptants. All small molecules were in 20  $\mu$ M concentration. (B) Chemical structures of the quinine analogs.
